# Supplementary material
Source: publisher site journal article supplement (https://www.dovepress.com/article/271927)
Supplement: Supplementary file 1 [file get_supplementary_file.php]

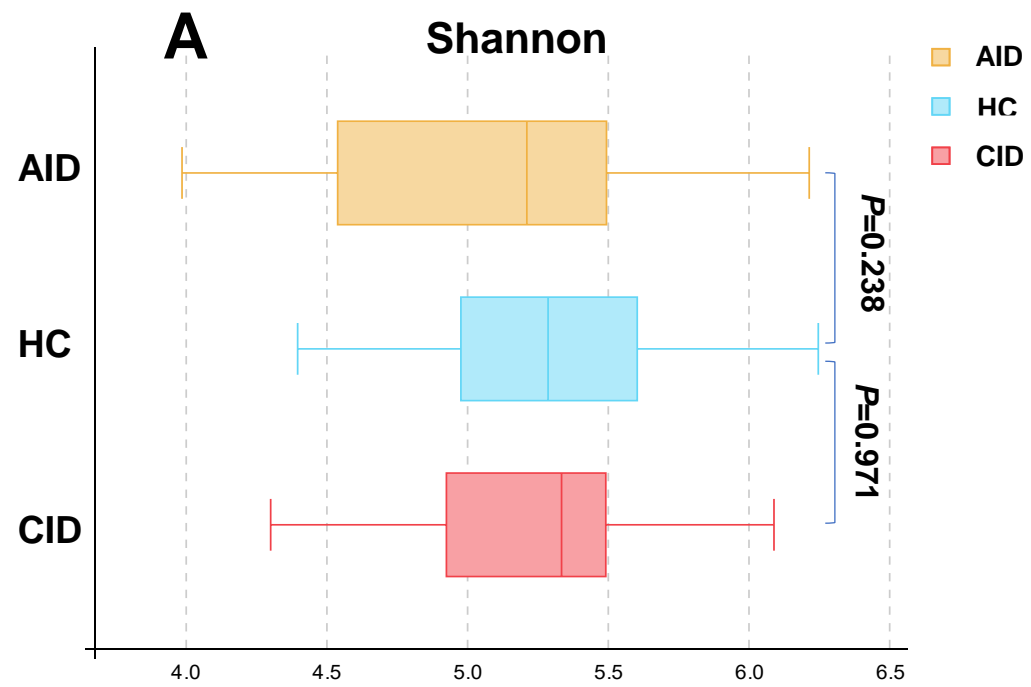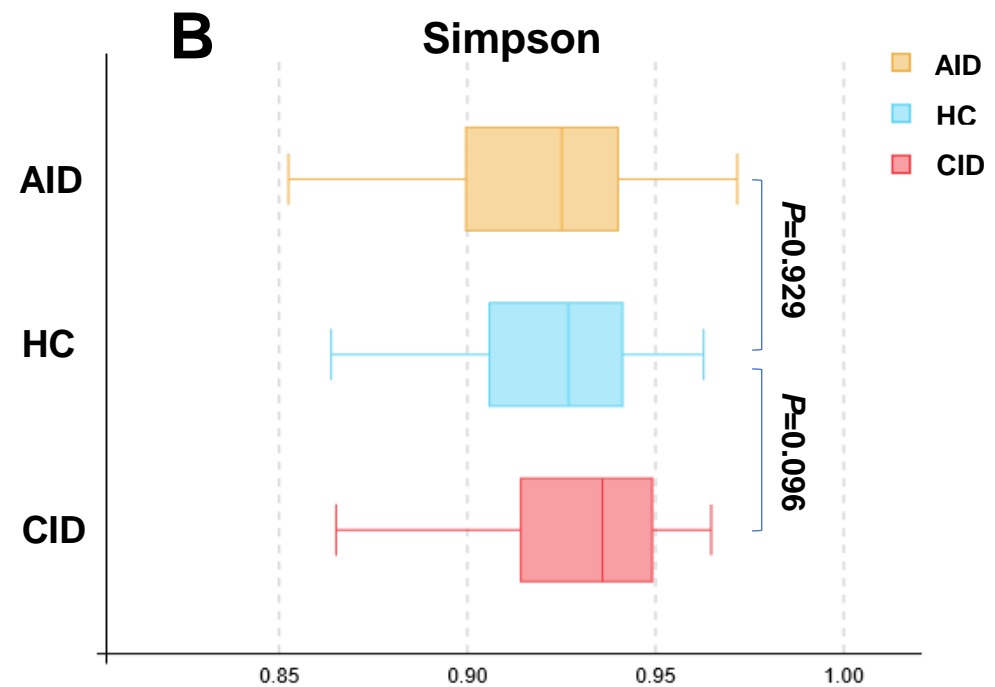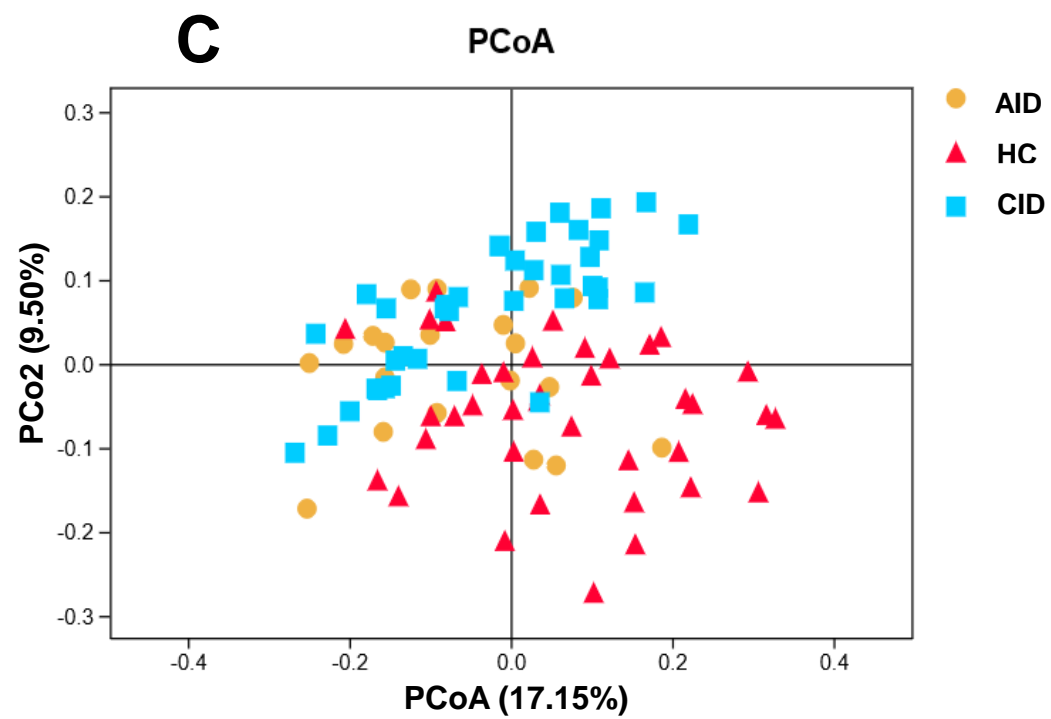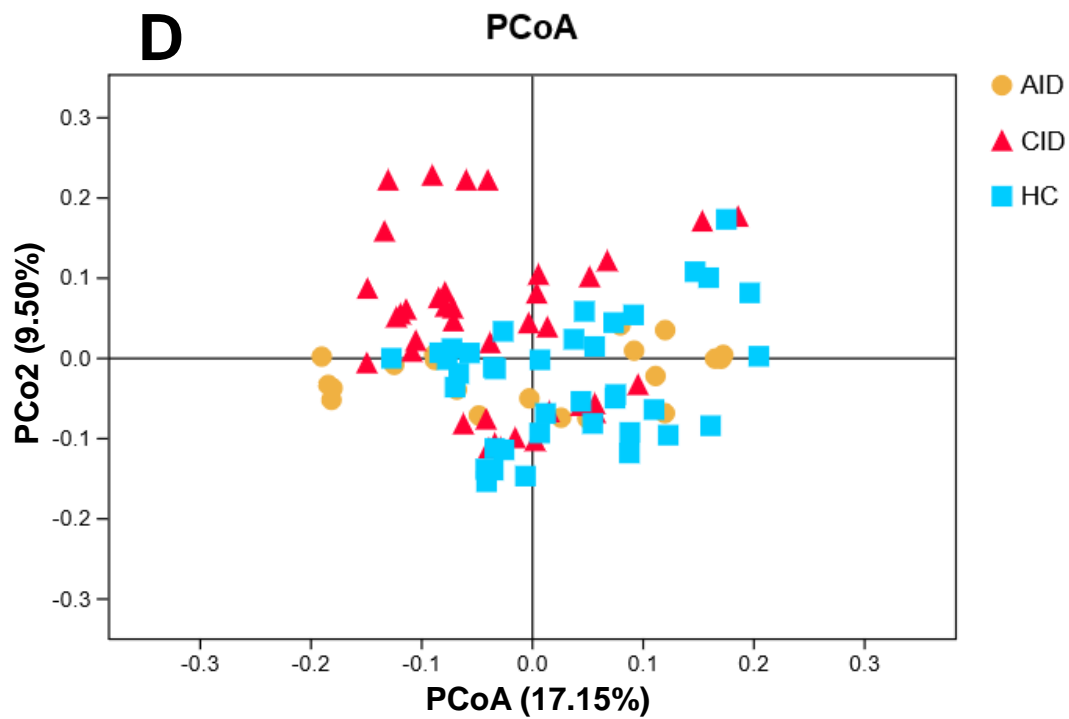

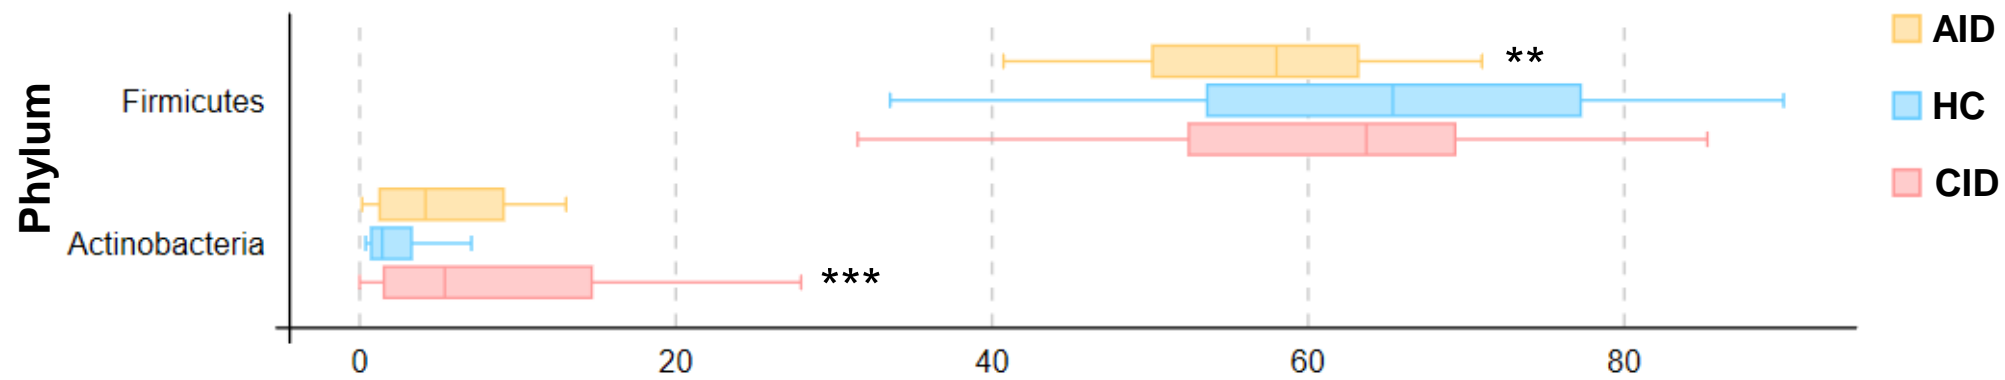

**Legends of the supplementary figures:**

**Figure S1:** Phylogenetic diversity of gut microbiomes among AID, CID and HC group

**Note** Comparison of the Shannon (**A**), and Simpson (**B**) index between different groups (Wilcoxon rank-sum test). (**C**) PCoA of weighted UniFrac distance (HC vs AID vs CID,  $p < .001$ ) and (**D**) PCoA of unweighted UniFrac distance (HC vs AID vs CID,  $p < .001$ ) demonstrated that the microbiome composition of acute and chronic insomnia patients clustered separately from HCs.

**Figure S2:** Comparison of relative abundance at the bacterial phylum levels between AID, CID and HC groups. Linear regression model controlled for age, gender, PHQ, GAD and abdominal dysfunction.  $**p < .01$ ,  $***p < .001$ , each group with respect to the HC group
